## Zinc potentiates dopamine neurotransmission and cocaine seeking

Juan L. Gomez<sup>1</sup>, Jordi Bonaventura<sup>1</sup>, Jacqueline Keighron<sup>2</sup>, Kelsey M. Wright<sup>1</sup>, Dondre L. Marable<sup>1</sup>, Lionel A. Rodriguez<sup>1</sup>, Sherry Lam<sup>1</sup>, Meghan L. Carlton<sup>1</sup>, Randall J. Ellis<sup>1</sup>, Chloe Jordan<sup>3</sup>, Guo-hua Bi<sup>3</sup>, Marco Pignatelli<sup>4</sup>, Michael J. Bannon<sup>5</sup>, Zheng-Xiong Xi<sup>3</sup>, Gianluigi Tanda<sup>2</sup>, Michael Michaelides<sup>1,6\*</sup>

<sup>1</sup>Biobehavioral Imaging and Molecular Neuropsychopharmacology Unit, National Institute on Drug Abuse Intramural Research Program, Baltimore, MD, 21224, USA

<sup>2</sup>Medication Development Program, National Institute on Drug Abuse Intramural Research Program, Baltimore, MD, 21224, USA

<sup>3</sup>Addiction Biology Unit, National Institute on Drug Abuse Intramural Research Program, Baltimore, MD, 21224, USA

<sup>4</sup>Department of Psychiatry and Taylor Family Institute for Innovative Psychiatric Research, Washington University School of Medicine, St Louis, MO 63110, USA

<sup>5</sup>Department of Pharmacology, Wayne State University School of Medicine, Detroit, MI, 48201, USA

<sup>6</sup>Department of Psychiatry, Johns Hopkins School of Medicine, Baltimore, MD, 21205, USA

\*Correspondence:

Michael Michaelides, PhD

251 Bayview Blvd, Room 05A721A

Baltimore, MD 21224

Tel: +1-443-740-2894

Fax: +1-443-740-2734

[mike.michaelides@nih.gov](mailto:mike.michaelides@nih.gov)

28 **Abstract**

29 Cocaine binds to the dopamine transporter (DAT) in the striatum to regulate cocaine reward  
30 and seeking behavior. Zinc ( $Zn^{2+}$ ) also binds to the DAT, but the *in vivo* relevance of this  
31 interaction is unknown. We found that cocaine abuse in humans correlated with low postmortem  
32 striatal  $Zn^{2+}$  content. In mice, cocaine decreased striatal vesicular  $Zn^{2+}$  and increased striatal  
33 synaptic  $Zn^{2+}$  concentrations and  $Zn^{2+}$  uptake. Striatal synaptic  $Zn^{2+}$  increased cocaine's *in vivo*  
34 potency at the DAT and was required for cocaine-induced DAT upregulation. Finally, genetic or  
35 dietary  $Zn^{2+}$  manipulations modulated cocaine locomotor sensitization, conditioned place  
36 preference, self-administration, and reinstatement. These findings reveal new insights into  
37 cocaine's pharmacological mechanism of action and indicate that  $Zn^{2+}$  can serve as a critical  
38 environmentally derived regulator of human cocaine addiction.

## 39 Introduction

40  
41 Zinc ( $Zn^{2+}$ ) is an essential trace element necessary for normal brain function (1-5). It is  
42 exclusively obtained via feeding and as the body lacks a specialized system for its storage, it needs  
43 to be obtained continuously to avoid a state of deficiency.  $Zn^{2+}$  is found in highest concentrations  
44 in the brain where it exists in two forms; a “fixed”, protein-bound form, that serves as a catalytic  
45 co-factor or as a structural component to many proteins, and comprises ~90% of total brain  
46 concentration, and a “free”, or labile form, comprising ~10% of total brain concentration.  $Zn^{2+}$   
47 levels in the synaptic cleft are dependent on *Slc30a3*, a gene encoding a vesicular  $Zn^{2+}$  transporter  
48 (ZnT3) predominantly localized at neuron terminals that co-release glutamate (6, 7). Vesicular  
49  $Zn^{2+}$  is released into the synapse upon neuronal activation, regulates neurotransmitter signaling,  
50 and plays important roles in brain disease (1-5), but its involvement in drug addiction is unknown.

51 Human drug abusers show dysregulated blood and hair  $Zn^{2+}$  content (8-13) but whether  
52 such deficits are involved in addiction to cocaine or other drugs is unclear. Cocaine binds to the  
53 dopamine transporter (DAT) to inhibit synaptic DA reuptake, which leads to an increase of  
54 extracellular DA (14). This mechanism underlies the direct subjective responses that accompany  
55 cocaine use (15), and is critical to cocaine self-administration in laboratory models, and cocaine  
56 reward and abuse liability in humans (16). Like cocaine,  $Zn^{2+}$  also binds to the DAT and promotes  
57 a conformation that inhibits DA uptake and, when cocaine is present,  $Zn^{2+}$  increases cocaine’s  
58 affinity and modulates its potency to inhibit DA uptake in *in vitro* assays (17-21). Nevertheless,  
59 whether  $Zn^{2+}$  affects cocaine potency at DAT *in vivo* or whether it plays a role in cocaine’s  
60 behavioral effects is unknown.

## 61 62 Methods

### 63 Subjects

64 De-identified postmortem human brain specimens were collected during the routine  
65 autopsy process as described in detail previously (46, 47). Briefly, the cause and manner of death  
66 were determined by forensic pathologists following medico-legal investigations that evaluated the  
67 circumstances of death including medical records, police reports, autopsy results, and toxicological  
68 data. Inclusion in the cocaine cohort (n = 20) was based on cocaine abuse as the cause of death, a  
69 documented history of drug abuse, and a toxicology positive for high levels of the cocaine  
70 metabolite benzoylecgonine and, in most cases, the short-lived cocaine adulterant levamisole, both

71 indicative of recent cocaine use prior to death. Control subjects (n=20) died as a result of  
72 cardiovascular disease or gunshot wound, had no documented history of drug abuse, and tested  
73 negative for cocaine and other drugs of abuse. Exclusion criteria for the study included a known  
74 history of neurological or psychiatric illness, death by suicide, estimated postmortem interval  
75 exceeding 20 hr, evidence of neuropathology (e.g. encephalitis, stroke), or chronic illness (e.g.  
76 cirrhosis, cancer, HIV, prolonged hospitalization). The final groups did not differ with regard sex,  
77 age, or race, nor with regard to brain pH, a well-established measure of sample quality and  
78 perimortem agonal state (48). Tissue from one cocaine user was not included due to very high  
79 cocaine metabolite levels.

80 Male C57Bl/6J mice were acquired from Jackson Labs at 8-weeks of age. Breeding pairs  
81 of *Slc30a3* (ZnT3) knockout mice were obtained from Dr. Thanos Tzounopoulos at the University  
82 of Pittsburgh and bred at the National Institute on Drug Abuse (NIDA) (Baltimore, MD) on a  
83 C57Bl/6J background. Mice were genotyped by Transnetyx (Cordova, TN) using tail snips. All  
84 mice were male and matched for age and weight. Mice were single-housed during experimental  
85 testing in a temperature and humidity-controlled environment on a regular light cycle (on at 7 am  
86 and off at 7 pm). Food and water were available ad libitum and mice were acclimated prior to any  
87 behavioral procedures by handling. All experimental procedures were carried out in accordance  
88 with the National Institutes of Health Guide for the Care and Use of Laboratory Animals and were  
89 approved by the Animal Care and Use Committee of NIDA.

#### 90 Total Reflection X-ray Spectroscopy (TXRF)

91 Tissue samples were collected and weighed in 1.5 mL Eppendorf tubes. The weight of the  
92 tissue was directly used to calculate element concentrations in  $\mu\text{g}/\text{kg}$  units. Each tissue sample was  
93 dissolved in 100  $\mu\text{L}$  of nitric acid (Sigma: NX0408) with 2  $\mu\text{L}$  of a gallium standard (conc. 1000  
94 ppm). Each sample was assessed in duplicate for TXRF elemental analysis using an S2 Picofox  
95 (Bruker, Billerica, MA). This instrument exposes the sample to an X-ray beam and measures  
96 fluorescence radiation specific to the element(s) of interest. Human samples were prepared from  
97 postmortem tissue collected from the anterior caudate. WT or ZnT3 KO mice received either  
98 saline, a single cocaine injection (20 mg/kg, i.p), or 8 repeated daily cocaine (20 mg/kg, i.p)  
99 injections and were euthanized 24 hrs after the last injection. 30 ppm and 5 ppm mice were exposed  
100 to each respective diet for 35 days and then euthanized. Mouse samples were prepared by slicing  
101

102 flash frozen tissue on a cryostat (100  $\mu\text{m}$  sections from Bregma 1.00 mm to 0.00 mm) and  
103 dissecting the cortex and striatum from each section.

#### 104 105 Synchrotron X-ray Fluorescence Microspectroscopy ( $\mu\text{XRFS}$ )

106 Brain concentrations and distributions of  $\text{Zn}^{2+}$  from C57BL/6J mice injected with saline or  
107 cocaine (10 mg/kg, i.p.) every other day for 8 days and euthanized 24 hrs after the last injection  
108 were measured at the X26a beamline at the National Synchrotron Light Source (NSLS) at  
109 Brookhaven National Laboratory (Upton, NY). The synchrotron X-ray beam was tuned to 12 keV  
110 using a Si(111) channel-cut monochromator. The monochromatic beam was then collimated to  
111  $350\ \mu\text{m} \times 350\ \mu\text{m}$  and then focused to approximately  $6\ \mu\text{m} \times 10\ \mu\text{m}$  using Rh-coated silicon mirrors  
112 in a Kirkpatrick–Baez (KB) geometry. The sample was placed at a  $45^\circ$  angle to the incident X-ray  
113 beam and X-ray fluorescence was detected with an energy dispersive, 9-element germanium array  
114 detector (Canberra, Meriden, CT) oriented at  $90^\circ$  to the incident beam. The sample was  
115 approximately 6 cm from the detector. A light microscope objective (Mitutoyo, M Plan Apo 5X)  
116 was coupled to a digital CCD camera for sample viewing. Energy dispersive spectra were collected  
117 by raster-scanning the sample through the X-ray beam using a dwell time of 0.3 s/pixel and a step  
118 size of 10  $\mu\text{m}$ . Zn  $K\alpha$ , fluorescence counts were then extracted from background-corrected energy  
119 dispersive spectra. All data were normalized to variations in incident photon flux by normalizing  
120 to changes in  $I_0$  measured by ion chamber upstream of the KB optics. XRFS calibration standards  
121 on Nuclepore® polycarbonate aerosol membranes expressing known ( $\pm 5\%$ ) concentrations of Zn  
122 ( $48.4\ \mu\text{g}/\text{cm}^2$ ) were also imaged in parallel to the samples (Micromatter, Vancouver, BC) and used  
123 to express results as  $\mu\text{g}/\text{cm}^2$ . Image analysis was carried out using ImageJ (National Institutes of  
124 Health, Bethesda, MD). Regions of interest (ROI) were drawn onto the cortex (Ctx), caudate  
125 putamen (CPu), nucleus accumbens (NAc), and measurements for each ROI were obtained.

#### 126 127 Zinc-Selenium Autometallography ( $\text{ZnSe}^{\text{AMG}}$ )

128 C57BL/6J mice were treated with 20 mg/kg cocaine daily for a total of 7 injections. 24  
129 hours after the final injection, mice were anesthetized with a ketamine-xylazine cocktail  
130 (ket=60mg/kg + xyl=12mg/kg) and injected (i.p.) with 15 mg/kg sodium selenite (Sigma Aldrich:  
131 214485) and placed on a heating pad while anesthetized for 60 minutes. Mice were then perfused  
132 with 0.1M phosphate buffer for 5 minutes. Brain tissue was dissected, and flash frozen in dry ice

133 cooled isopentane and stored at  $-80^{\circ}\text{C}$  until sectioning. Coronal brain sections ( $20\ \mu\text{m}$ ) were thaw  
134 mounted at the level of the striatum and hippocampus on positively-charged glass slides. Slides  
135 were stored at  $-20^{\circ}\text{C}$  until staining. Slides were loaded in non-metallic staining racks and allowed  
136 to reach room temperature. Slides were fixed in 95% ethanol for 15 min followed by hydration in  
137 70% (2 min) and 50% (2 min) ethanol ending in 3 x 2 min distilled water rinses. Slides were dipped  
138 in 0.5% gelatin and air dried prior to physical development. Developer was made by mixing Gum  
139 Arabic (50% solution, 100mL), citrate buffer (2.0M, 20mL), hydroquinone (1.7g in 30mL  
140  $\text{DDH}_2\text{O}$ ), silver lactate (0.22g in 30mL  $\text{H}_2\text{O}$ ), and  $\text{DDH}_2\text{O}$  (200mL). Developer was poured onto  
141 slides, incubated for 60 min in the dark then quickly checked at 10 min intervals until sections are  
142 dark brown. Slides were washed in slowly flowing tap water ( $37^{\circ}\text{C}$ ) for 10 min to remove gelatin  
143 then rinsed 3 x 2 min in distilled water. Slides were then incubated in 5% sodium thiosulphate  
144 (12min) and rinsed 2 x 2min in distilled water and post-fixed in 70% ethanol (30min). Optional  
145 counter stain using cresyl violet or toluidine blue (5min) followed by rinse 4 x 30 sec rinse in  
146 distilled water. Finally, slides were dehydrated in 95% ethanol (5min), 100% ethanol 2 x 5 min,  
147 xylene 2 x 5 min, and coverslipped with permount. For qualitative analysis, stained sections were  
148 imaged using brightfield microscopy. For quantitative analysis, sections were imaged using a LI-  
149 COR Odyssey (Lincoln, NE). Using ImageJ, ROIs were drawn on the Ctx, CPu and NAc. For each  
150 mouse we used 2 brain sections with 4 ROIs taken per brain region for a total of 16 sampled ROIs  
151 per region for each group. Bilateral ROIs were averaged for each region leading to a total of 8  
152 ROIs per region per mouse.

### 153 154 $^{65}\text{Zn}$ Uptake Experiments using Positron Emission Tomography (PET)

155 ZnT3 WT and KO mice were anesthetized with isoflurane and placed in a prone position  
156 on the scanner bed of a nanoScan PET/CT (Mediso, USA) injected intravenously ( $\sim 150\ \mu\text{L}$ ) with  
157  $^{65}\text{ZnCl}_2$  ( $\sim 2.2\ \text{MBq}$ ) and PET data were acquired for 2 hours followed by a CT scan. After  
158 scanning, animals were returned to their home cage. Scans were repeated on days 1, 3, 7, and 14.  
159 For cocaine experiments, mice were injected with  $^{65}\text{ZnCl}_2$  as above and then injected immediately  
160 with saline or cocaine (20 mg/kg, i.p). Saline and cocaine injections continued daily for 7 days.  
161 Mice were scanned on Day 1 and Day 7 after  $^{65}\text{ZnCl}_2$  injection as above. In all cases, the PET data  
162 were reconstructed and corrected for dead-time and radioactive decay. Qualitative and quantitative  
163 assessments of PET images were performed using the PMOD software environment (PMOD

164 Technologies, Zurich Switzerland). Time-activity curves were generated using manually drawn  
165 volumes of interest using the CT image as a reference. Standardized uptake values (SUV) were  
166 calculated using the formula  $SUV(i) = C(i) / (ID \times BW)$  where  $C(i)$  is the activity value at a given  
167 time point (in kBq/cc),  $ID$  is the injected dose (in MBq) and  $BW$  is the animal's body weight (in  
168 kg). For voxel-wise analyses we used Statistical Parametric Mapping (SPM12, London, UK) as  
169 previously described (49). First, all the images were co-registered and masked to the reference  
170 mouse atlas in PMOD. Regional changes in uptake were assessed relative to global (whole-brain)  
171 uptake. A repeated-measures analysis of variance (ANOVA) model was used that defined saline  
172 vs. cocaine-treated mice scanned at 1- and 7-days post  $^{65}\text{ZnCl}_2$  injection. Images were subtracted  
173 after intensity normalization to 100 by the proportional scaling method. After estimation of the  
174 statistical model, an contrast (Cocaine > Vehicle) was applied to reveal the effects of interest.  
175 These effects were overlaid on the reference MRI. An uncorrected  $P$ -value of 0.05 with a cluster  
176 threshold value of 50 were used as thresholds to determine statistical significance.

177

#### 178 *Ex vivo* $^{65}\text{Zn}$ autoradiography

179 One day after the last PET scan, mice were euthanized and brain tissue was dissected, flash  
180 frozen in isopentane, and stored at  $-80^\circ\text{C}$  until sectioning. Tissue was sectioned and thaw mounted  
181 on positively charged glass slides. Slides were placed on BAS-IP SR 2040 E Super Resolution  
182 phosphor screens (GE Healthcare) for 14-days and imaged using a phosphor imager (Typhoon  
183 FLA 7000; GE Healthcare).

184

#### 185 Radioligand Binding Assays

186 Brains from euthanized C57Bl/6J mice were removed and striata dissected and quickly  
187 frozen until use. The tissue was weighed and suspended in 10 times (w/v) of ice-cold Tris-HCl  
188 buffer (50 mM, pH 7.4). The suspension was homogenized with a Polytron homogenizer  
189 (Kinematica, Basel, Switzerland) under ice. Homogenates were centrifuged at 48,000g (50 min,  
190  $4^\circ\text{C}$ ) and washed twice in the same conditions to isolate the membrane fraction. Protein was  
191 quantified by the bicinchoninic acid method (Pierce). For competition experiments, membrane  
192 suspensions (50  $\mu\text{g}$  of protein/ml) were incubated in 50 mM Tris-HCl (pH 7.4) 0.5 nM of [ $^3\text{H}$ ]WIN-  
193 35428 (Perkin-Elmer) and increasing concentrations of the indicated competing drugs (WIN-  
194 35428 or cocaine) in the presence or the absence of 100 nM, 10  $\mu\text{M}$  or 1 mM of  $\text{ZnCl}_2$  during 2 h

195 at RT. Nonspecific binding was determined in the presence of 100  $\mu$ M cocaine. In all cases, free  
196 and membrane-bound radioligand were separated by rapid filtration through Whatman (Clifton,  
197 NJ) GF/B filters, pre-soaked in 0.05% polyethyleneimine by using a Brandel R48 filtering  
198 manifold (Brandel Inc., Gaithersburg, MD). The filters were washed twice with 5 ml of cold buffer  
199 and transferred to scintillation vials. Beckman Ready Safe scintillation cocktail (3.0 ml) was  
200 added, and the vials were counted the next day with a Beckman 6000 liquid scintillation counter  
201 (Beckman Coulter Instruments, Fullerton, CA) at 50% efficiency.

202

### 203 *In vitro* Autoradiography using [<sup>3</sup>H]WIN-35,428

204 Brain tissue from WT and ZnT3 KO mice was dissected, flash frozen in isopentane, and  
205 stored at -80°C until sectioning. Tissue was sliced on a cryostat at 16  $\mu$ m and thaw mounted on  
206 positively charged glass slides and stored at -20°C until autoradiography. Incubation Buffer  
207 consisted of 50 mM Tris-HCl (7.4 pH) and 100 mM NaCl in deionized water. [<sup>3</sup>H]WIN-35,428  
208 Total binding buffer (S.A. 82.9 Ci/mmol, Conc. 1 mCi/mL) was made in incubation buffer at a  
209 concentration of 10 nM. ZnCl<sub>2</sub> binding buffer was made using the Total binding buffer stock and  
210 adding ZnCl<sub>2</sub> for a concentration of 10  $\mu$ M. Slides were pre-incubated in ice-cold incubation buffer  
211 for 20 minutes then transferred to respective radioactive incubation buffers (i.e. total or  
212 total+ZnCl<sub>2</sub>) for 120 minutes on ice. Slides were then washed 2 x 1min in ice-cold 50 mM Tris-  
213 HCl (pH=7.4) then dipped (30 sec) in ice-cold deionized water. Slides were dried under stream of  
214 cool air and placed on BAS-IP TR 2025 E Tritium Screen (GE Healthcare) for 5-days and imaged  
215 using a phosphor imager (Typhoon FLA 7000; GE Healthcare). Sections were analyzed using  
216 Multigauge software (Fujifilm, Japan).

217

### 218 *In vivo* Fast Scan Cyclic Voltammetry (FSCV)

219 FSCV procedures follow those of recently published work from our laboratory in  
220 anesthetized mice using electrical stimulation (50). Briefly, glass sealed 100  $\mu$ m carbon fiber  
221 microelectrodes were pre-calibrated with known concentrations of dopamine and changes in pH  
222 to allow for a principal component analysis (PCA) of the raw data using HDCV (UNC, Chapel  
223 Hill, NC). Dopamine was identified by cyclic voltammogram using a voltage scan from -0.3 to  
224 1.4V at 400 V/s. During the experiment an external stimulus was applied using the tungsten  
225 electrode every 5 min comprised of 24 pulses 4ms in width at 60 Hz and 180  $\mu$ A while the working



226 electrode was implanted in the striatum (AP: +1.5 mm; ML:  $\pm$ 1.0 mm; DV: -3.2 to -3.7 mm from  
227 bregma). After PCA data were analyzed to determine the  $DA_{Max}$  and DA clearance rate using a  
228 custom macro written in Igor Carbon Pro which identified peaks greater than 3x root mean square  
229 noise and fit to equation 1 where  $DA_{Max}$  represents the peak DA concentration measured, k is the  
230 rate constant, and t is time (50).

$$231 \quad (1) DA(t) = DA_{Max}e^{-k(t-t_0)}$$

232

### 233 Cocaine Locomotor Sensitization

234 Each session during the development phase was 30 minutes and mice were only exposed  
235 to one session per day with locomotor activity quantified as distance traveled (cm). All injections  
236 were administered (i.p.). Mice were first habituated to the locomotor activity chambers (Opto-  
237 varimex ATM3, Columbus Instruments). On the next two sessions mice were injected with saline  
238 and placed in the chambers. On the following five sessions, separate groups were injected with  
239 either saline or cocaine (10 mg/kg) in a counterbalanced design. Mice were then allowed 7-days  
240 of withdrawal in the colony room and then returned to the behavior room for testing expression of  
241 sensitization. Briefly, all mice were allowed access to the activity chambers for 60 minutes  
242 followed by increasing doses of cocaine (saline, 5, 10, 20 mg/kg) every 60 minutes. Data collection  
243 was paused but chambers were not cleaned in-between cocaine dosing, each mouse was picked  
244 up, injected, and placed back in chamber to continue data collection.

245

### 246 Cocaine Conditioned Place Preference (CPP)

247 The task consisted of 10 sessions, 1 per day, in chambers with two visually distinct sides,  
248 one with clear walls and white floor and one with checkered walls and black floor. The sides were  
249 divided by a door with and without access to the other side. Locomotor activity was measured by  
250 way of time spent in each chamber as well as total distance traveled (Opto-varimex ATM3,  
251 Columbus Instruments). In the first session the mice could explore both sides of a conditioning  
252 box for 15 minutes to determine inherent side preference, designated as the Pre-Test. Using this  
253 data, the cocaine-paired side was pseudo-randomized so that mice with a preference for one side  
254 (>60%) were cocaine-paired on the other, non-preferred side. Mice with no side preference were  
255 cocaine-paired in a counterbalanced fashion. Separate groups of mice were conditioned with either  
256 a 5, 10, or 20 mg/kg dose of cocaine. In an alternating fashion for 8-days, mice were injected (i.p.)

257 with either saline or cocaine and placed in the predetermined drug/no drug side of the chamber for  
258 30 minutes. The mice had no physical access to the other side but were still able to see through the  
259 clear divider wall. Each mouse had a total of 4 saline-paired days and 4 cocaine-paired days. The  
260 last session was the same as the first and designated the Test session. Time spent in the cocaine-  
261 paired chamber during the Pre-Test session (prior to conditioning) was subtracted from time spent  
262 in the cocaine-paired chamber during the Test session and expressed as the Preference score.

263

#### 264 Mouse Intravenous Cocaine Self-Administration

265 Mice were implanted with jugular vein catheters under ketamine/xylazine anesthesia and  
266 using aseptic surgical techniques. A 6.0 cm length MicroRenathane (ID 0.012", OD 0.025";  
267 Braintree Scientific Inc., Braintree, MA, USA) catheter was inserted 1.2 cm into the right jugular  
268 vein and anchored to a 24-gauge steel cannula (Plastics One, Roanoke, VA, USA) that was bent  
269 at a 100° angle and mounted to the skull with cyanoacrylate glue and dental acrylic. A 2.5-cm  
270 extension of flexible tubing was connected to the distal end of the cannula. The mice were allowed  
271 5–7 days for recovery, during which time 0.05 ml of a 0.9% saline solution containing 20 IU/ml  
272 heparin and 0.33 mg/ml gentamycin was infused daily through the catheter to prevent catheter  
273 clotting and infection. Thereafter, 0.05 ml of 0.9% saline solution containing 20 IU/ml heparin was  
274 infused immediately prior to and immediately following each daily self-administration session.  
275 When needed, i.v. brevipal (a barbiturate) was used to test catheter patency between the self-  
276 administration sessions. During cocaine self-administration sessions, the flexible tubing extension  
277 was connected to a perfusion pump (Med Associates, Fairfax, VT) via a PE50 tubing connector.  
278 After daily self-administration sessions, the free end of the cannula guide was always kept sealed.

279 Operant test chambers (Med Associates, Fairfax, VT) contained two levers (active and  
280 inactive) located 2.5 cm above the floor as well as a cue light above each lever. A house light  
281 mounted on the opposite side of the chamber signaled the start of each 3 hr session and remained  
282 illuminated until the session ended. For self-administration sessions, a liquid swivel mounted on a  
283 balance arm above the chamber allowed for i.v. drug delivery in freely-moving mice. Depression  
284 of the active lever resulted in the activation of an infusion pump; depression of the inactive lever  
285 was recorded but had no scheduled consequences. Each infusion was paired with two discrete cues:  
286 illumination of the cue light above the active lever, and a cue tone that lasted for the duration of

287 the infusion. Experimental events were controlled by a PC programmed in Medstate Notation and  
288 connected to a Med Associates interface.

289 After recovery from surgery, mice (n=11 WT, n=11 KO) were placed into operant  
290 chambers and allowed to lever-press for i.v. cocaine self-administration under a fixed-ratio 1 (FR1)  
291 reinforcement schedule (i.e., each lever press leads to one cocaine infusion) for 3 h daily. Each  
292 cocaine infusion lasted 4.2 sec, during which additional active lever responses were recorded but  
293 had no consequences (i.e. non-reinforced active lever response). Mice were trained initially for a  
294 high unit dose of cocaine (1 mg/kg/infusion) to potentiate acquisition of self-administration until  
295 stable self-administration was achieved, which was defined as earning at least 20 infusions per 3  
296 hr session and an active/inactive lever press ratio exceeding 2:1. Then the mice were switched to  
297 a multiple-dose schedule to observe the dose-dependent cocaine self-administration according to  
298 a descending cocaine dose sequence from the initial dose of 1 mg/kg/infusion (sessions 1-13) to  
299 0.5 mg/kg/infusion (sessions 14-20), 0.25 mg/kg/infusion (sessions 21-23), 0.125 mg/kg/infusion  
300 (sessions 24-27), and 0.0625 mg/kg/infusion (sessions 28-29). Mice that did not reach stability  
301 criteria, lost catheter patency, or showed excessive high-level inactive lever responding (>100  
302 presses per session) were excluded from further experimentation. To prevent cocaine overdose,  
303 maximally allowed cocaine infusions were 50 (0.1 and 0.5 mg/kg/infusion), 100 (0.25  
304 mg/kg/infusion), 200 (0.125 mg/kg/infusion), or 400 (0.0625 mg/kg/infusion), respectively during  
305 each 3-h session. The number of cocaine infusions earned, and active and inactive lever responses  
306 were recorded for each session. The last 2-3 days of cocaine self-administration data at each dose  
307 were averaged and used to compare dose-response performance between WT and KO mice.

308 After the completion of the above cocaine dose-response experiment, the animals were  
309 switched to cocaine self-administration under PR reinforcement schedule. During PR conditions,  
310 the work requirement (lever presses) needed to receive a cocaine infusion was raised progressively  
311 within each test session according to the following PR series: 1, 2, 4, 6, 9, 12, 15, 20, 25, 32, 40,  
312 50, 62, 77, 95, 118, 145, 178, 219, 268, 328, 402, 492, and 603 until the break point was reached.  
313 The break point was defined as the maximal workload (i.e., number of lever presses) completed  
314 for the last cocaine infusion prior to a 1-h period during which no infusions were obtained by the  
315 animal. Animals were tested for cocaine self-administration under PR reinforcement at three doses  
316 (starting at 0.25, then 1 and then 0.5 mg/kg/infusion) from days 30 to 38.

317           After the completion of the PR experiments, the same groups of animals continued for  
318 cocaine extinction and reinstatement tests. During extinction, syringe pumps were turned off and  
319 the cocaine-associated cue light and tone were unavailable. Thus, lever pressing was recorded but  
320 had no scheduled consequences. Extinction training continued for about 20 days until the  
321 extinction criteria were met (i.e., lever responding <20% of the self-administration baseline) for at  
322 least 3 sessions. Mice then received a 10 mg/kg i.p cocaine injection to evoke reinstatement  
323 of drug-seeking behavior. During reinstatement testing, active lever presses lead to re-exposure to  
324 the cue light and tone previously paired with cocaine infusions, but not to actual cocaine infusions.  
325 Active and inactive lever responses were recorded for each extinction and reinstatement session.  
326 Lever pressing behavior during the cocaine-primed session was compared to the average lever  
327 presses during the last 3 days of extinction.

328

### 329 Custom Diets

330           Diets were formulated by Research Diets, Inc via use of AIN-93M mature rodent diet. The  
331 diets were compositionally identical, but one diet had an adequate amount of Zn<sup>2+</sup> (30 ppm) and  
332 one diet had a deficient amount of Zn<sup>2+</sup> (5 ppm). Zn<sup>2+</sup> concentration in each diet was confirmed  
333 in-house via random sampling of chow pellets and TXRF (S2 Picofox, Bruker, Billerica, MA).

334

### 335 Body Weight and Food Intake Measurements

336           C56BL/6J mice arrived at the NIDA mouse colony and allowed one week of environmental  
337 acclimation with regular chow and water available *ad lib*. After acclimation period, mice were  
338 given a 30 ppm Zn<sup>2+</sup> diet or a 5 ppm Zn<sup>2+</sup> diet for a minimum of 35 days prior to any behavioral  
339 or physiological manipulations. Mice stayed on the diet until the completion of the experiment.  
340 Mice were individually housed and weighed 3 times per week (MWF) along with food weight to  
341 track the amount of food consumed.

342

### 343 Immunohistochemistry

344           Coronal sections were sliced on a cryostat (30 μm), collected in 6-well plates with PBS,  
345 and stored at 4°C until use. Sections were transferred to 12-well plates and permeabilized in  
346 washing buffer (PBS + Triton X-100 0.1%) for 10 min at room temperature on shaker. Tissue was  
347 blocked in blocking buffer (BSA 3% + PBS + Triton X-100 0.1%) for 60 min at RT on shaker.

348 Tissue was incubated overnight in primary ZnT3 antibody (1:500) (anti-rabbit, Synaptic Systems,  
349 Goettingen, Germany) at 4°C. Tissue was washed with washing buffer 3 x 10 min at RT then  
350 incubated in secondary antibody (Alexa 480-Rabbit 1:400, Topro (1:1200), and DAPI (1:600) for  
351 2 hrs at RT in the dark. Tissue was washed with washing buffer 3 x 10 min, transferred to dish  
352 with PBS, mounted on positively charged glass slides, and coverslipped with aqueous mounting  
353 medium (90% glycerol + 30 mM Tris-HCl, pH 8.0) and imaged using confocal microscopy.

354

### 355 Statistics

356 Depending on experiment, we used linear regression, paired/unpaired/one sample t-tests,  
357 single/multi-factor ANOVA or a mixed effects model (to account for missing data) taking repeated  
358 measures into account when appropriate. Significant main or interaction effects were followed by  
359 posthoc comparisons with appropriate corrections. All statistical tests were evaluated at the  $p \leq 0.05$   
360 level.

361

## 362 **Results**

363

### 364 **Striatal Zn<sup>2+</sup> is low in human cocaine abusers and correlates with cocaine intake**

365 The highest DAT density in the brain is found in the striatum (22), a region heavily  
366 implicated in cocaine addiction (23-26). We performed elemental profiling in postmortem striatal  
367 tissue derived from human cocaine abusers or matched controls (Figure 1A to C and Figure S1)  
368 using total reflection X-ray fluorescence spectroscopy (TXRF). Cocaine users had significantly  
369 lower striatal Zn<sup>2+</sup> levels (Figure 1D) and these levels significantly correlated with plasma  
370 concentrations of benzoylecgonine, (Figure 1E) a stable cocaine metabolite indicative of recent  
371 cocaine use (27).

372

### 373 **Cocaine increases synaptic Zn<sup>2+</sup> levels and turnover in the striatum via ZnT3-mediated** 374 **exocytosis**

375 Unlike TXRF, synchrotron X-ray fluorescence microspectroscopy ( $\mu$ SXRF) allows both  
376 visualization and quantification of total Zn<sup>2+</sup> in brain slices (28, 29) (Figure 2A and Figure S2).  
377  $\mu$ SXRF revealed that mice exposed to daily cocaine injections (10 mg/kg, intraperitoneal (IP), 4

378 days) and euthanized 24 hours later had significantly greater total  $Zn^{2+}$  levels in striatal and cortical  
379 regions compared to vehicle-injected mice (Figure 2, A and B).

380 ZnT3 knockout (KO) mice lack the ability to package vesicular  $Zn^{2+}$  and by extension  
381 synaptic  $Zn^{2+}$  release (7). ZnT3 KO mice are healthy and do not exhibit significant behavioral or  
382 physiological abnormalities (30, 31). TXRF and  $\mu$ SXRF are limited in providing measures of total  
383  $Zn^{2+}$ . Therefore, we performed Timm staining, which exclusively labels vesicular  $Zn^{2+}$  (32), in  
384 mice exposed to cocaine and ZnT3 KO mice. Vesicular  $Zn^{2+}$  was highly localized to discrete  
385 regions including cingulate cortex (Ctx), dorsomedial caudate putamen (CPu), and medial nucleus  
386 accumbens (NAc) (Figure 2C and Figure S3) (33). As expected, ZnT3 KO mice lacked vesicular  
387  $Zn^{2+}$  (Figure 2C). Mice exposed to daily cocaine injections (20 mg/kg/day, IP, 8 days) and  
388 euthanized 24 hours later exhibited significantly lower vesicular  $Zn^{2+}$  staining compared to  
389 vehicle-treated mice (Figure 2, C and D) indicating that cocaine decreases vesicular  $Zn^{2+}$  levels.

390 We hypothesized that cocaine would increase synaptic  $Zn^{2+}$  levels in the striatum via ZnT3-  
391 mediated exocytosis. We exposed wildtype (WT) and ZnT3 KO mice to daily vehicle or cocaine  
392 injections (20 mg/kg/day, IP, 1 or 8 days) and euthanized them 24 hours later followed by  
393 assessment of  $Zn^{2+}$  using TXRF. Vehicle-treated ZnT3 KO mice had significantly lower  $Zn^{2+}$  than  
394 vehicle-treated WT mice in cortex (Figure S4), where ZnT3 expression and vesicular  $Zn^{2+}$  pools  
395 are high. Vehicle-treated WT and KO mice did not differ in striatal  $Zn^{2+}$ , as synaptic  $Zn^{2+}$   
396 differences in this region under these basal circumstances were below the detection limit of TXRF  
397 (Figure 2E). However, after cocaine, WT mice had significantly greater striatal  $Zn^{2+}$  content than  
398 ZnT3 KO mice (Figure 2E) indicating that ZnT3 regulates cocaine-dependent increases in synaptic  
399  $Zn^{2+}$ .

400 Brain  $Zn^{2+}$  has not been previously studied *in vivo*.  $^{65}Zn$  produces annihilation photons at  
401 511 keV at a low (~3%) abundance and has a physical half-life of ~244 days. We reasoned that  
402 these characteristics would be sufficient for noninvasive and longitudinal detection of  $Zn^{2+}$  uptake  
403 and kinetics using positron emission tomography (PET). To confirm, WT and ZnT3 KO mice were  
404 injected intravenously (IV) with 2  $\mu$ Ci/g  $^{65}ZnCl_2$  and scanned using PET (Figure 2F and Figure  
405 S5). Owing to the slow kinetics and long biological and physical half-lives of  $Zn^{2+}$  (34), mice were  
406 scanned longitudinally at different days after  $^{65}ZnCl_2$  injection (Figure 2F).  $^{65}Zn$  showed rapid  
407 brain uptake, exhibited slow brain clearance and was detected up to 14 days after injection (Figure  
408 2G and H and Figure S5). ZnT3 deletion significantly reduced brain uptake of  $^{65}Zn$  at 7- and 14-

409 days post injection (Figure 2H). This was confirmed *ex vivo* using autoradiography, which further  
410 showed that  $^{65}\text{Zn}$  brain distribution overlapped with both vesicular  $\text{Zn}^{2+}$  distribution and ZnT3  
411 expression (Figure 2I and Figure S6). To examine effects of cocaine on  $^{65}\text{Zn}$  brain uptake, we  
412 injected mice with  $^{65}\text{ZnCl}_2$  as above followed by daily vehicle or cocaine injections (20 mg/kg/day,  
413 IP, 8 days) and performed PET. Compared to vehicle, cocaine increased uptake of  $^{65}\text{Zn}$  in brain  
414 regions with high ZnT3 expression, including the cingulate cortex, NAc, and hippocampus but  
415 decreased it in areas of low ZnT3 expression like thalamus (Figs. 2J and Figure S7). Taken together  
416 with the aforementioned findings, this result indicates that cocaine increases synaptic  $\text{Zn}^{2+}$   
417 turnover/metabolism.

418

### 419 **Synaptic $\text{Zn}^{2+}$ binds to the DAT and increases the *in vivo* potency of cocaine on DA** 420 **neurotransmission**

421 *In vitro* studies in cells indicate that  $\text{Zn}^{2+}$  binds to the DAT and causes i) DA reuptake  
422 inhibition and ii) increased cocaine DAT binding (17, 20, 21, 35, 36). We reproduced these  
423 findings using striatal membranes where a physiologically achievable concentration (10  $\mu\text{M}$ ) of  
424  $\text{Zn}^{2+}$  (1) significantly increased cocaine affinity and binding to the DAT (Figure 3, A to C). A  
425 higher, supraphysiological concentration (1 mM), decreased cocaine affinity (Figure 3, A and B).  
426 To assess cocaine's *in vivo* effects at the DAT as a function of synaptic  $\text{Zn}^{2+}$ , we performed *in vivo*  
427 fast scan cyclic voltammetry (FSCV) in the striatum of WT and ZnT3 KO mice after electrically  
428 evoked DA release and escalating cocaine injections (5, 10, 20 mg/kg, IP) (Figure 3D to G). As  
429 expected, cocaine significantly enhanced DA release after electrical stimulation and concomitantly  
430 decreased DA clearance in WT mice (Figure 3, D, F and G). In contrast, ZnT3 KO mice exhibited  
431 significantly lower cocaine-induced DA release and faster DA clearance than WT mice (Figure 3,  
432 E to G), indicating that synaptic  $\text{Zn}^{2+}$  increases the *in vivo* potency of cocaine at the DAT by  
433 promoting DA release and delaying DA clearance.

434

### 435 **Synaptic $\text{Zn}^{2+}$ potentiates cocaine locomotor sensitization and reward and is required for** 436 **cocaine-induced DAT upregulation and cocaine reinstatement**

437 Based on the above findings, we hypothesized that synaptic  $\text{Zn}^{2+}$  would modulate cocaine-  
438 related behaviors. First, we tested cocaine-induced locomotor sensitization in WT and ZnT3 KO  
439 mice. WT mice showed robust development of locomotor sensitization to daily injections of

440 cocaine (10 mg/kg/day, IP, 5 days) (Figure 4A). KO mice sensitized to cocaine but showed  
441 significantly lower cocaine-induced locomotion than WT mice (Figure 4A). One week later,  
442 vehicle-treated and cocaine-treated mice were tested for expression of cocaine locomotor  
443 sensitization via exposure to escalating cocaine injections (5, 10, and 20 mg/kg, IP). WT mice with  
444 prior cocaine exposure (cocaine-treated) showed significantly greater locomotor activity at 5 and  
445 10 mg/kg cocaine compared to WT mice with no prior cocaine exposure (vehicle-treated) (Figure  
446 4B), indicating expression of locomotor sensitization. In contrast, cocaine-treated KO mice did not  
447 show a significant increase in locomotor activity compared to vehicle-treated KO mice (Figure  
448 4C). Neither WT nor ZnT3 KO cocaine-treated mice differed from the corresponding vehicle-  
449 treated mice at 20 mg/kg (Figure 4, B and C).

450 Cocaine exposure upregulates DAT (25, 26, 37). To assess cocaine-induced DAT changes  
451 as a function of synaptic Zn<sup>2+</sup>, mice from the above sensitization experiments were euthanized 24  
452 hours after the last cocaine injection, the striatum was dissected, and DAT binding assays were  
453 performed using [<sup>3</sup>H]WIN-35,428. Vehicle-treated WT mice did not significantly differ from  
454 vehicle- or cocaine-treated ZnT3 KO mice in [<sup>3</sup>H]WIN-35,428 binding (Figure 4D). Cocaine-  
455 treated WT mice had greater [<sup>3</sup>H]WIN-35,428 binding than vehicle-treated WT mice and  
456 significantly greater [<sup>3</sup>H]WIN-35,428 binding than both vehicle-treated and cocaine-treated KO  
457 mice, indicating that synaptic Zn<sup>2+</sup> is necessary for cocaine-induced DAT upregulation.

458 Next, we tested whether synaptic Zn<sup>2+</sup> is involved in cocaine reward using the conditioned  
459 place preference (CPP) procedure. Using one cohort per cocaine dose, WT mice exhibited cocaine  
460 preference at 5, 10, and 20 mg/kg, whereas ZnT3 KO mice exhibited cocaine preference only at  
461 10 and 20 mg/kg (Figure 4E).

462 Finally, we examined whether synaptic Zn<sup>2+</sup> is involved in intravenous cocaine self-  
463 administration (SA). WT mice showed robust acquisition of cocaine SA (1 mg/kg/infusion for 13  
464 days), as evidenced by significantly greater and sustained responding on the cocaine-reinforced  
465 active lever over the non-reinforced inactive lever on days 10 through 12 (Figure 4F). Mice were  
466 then switched to a lower cocaine dose (0.5 mg/kg/infusion for 7 days). WT mice immediately  
467 reached the maximum allowed number (50) of infusions (Figure 4G). In contrast, ZnT3 KO mice  
468 failed to acquire cocaine SA at the 1 mg/kg/infusion dose (Figure 4H). At the 0.5 mg/kg/infusion  
469 dose, ZnT3 KO mice took longer time (3 days) to learn to discriminate the cocaine-reinforced  
470 active lever over the inactive lever and took longer time (5 sessions) to reach 50 infusions (Figure



471 4I). After acquisition of cocaine self-administration, mice were tested at lower doses of cocaine.  
472 WT and KO mice did not differ in the number of cocaine infusions at these lower doses (Figure  
473 S8) but KO mice showed significantly lower cocaine intake at the 1 and 0.125 mg/kg/infusion  
474 doses (Figure 4J). Mice were then assessed for extinction of cocaine self-administration, but no  
475 genotype differences were observed (Figure 4K). After mice had extinguished their lever  
476 responding for cocaine, they were tested for reinstatement (relapse) responding to a cocaine  
477 priming injection (10 mg/kg, IP). WT mice showed a robust and significant reinstatement response  
478 to cocaine priming whereas KO mice did not (Figure 4L and M). In sum, these behavioral findings  
479 suggest that synaptic  $Zn^{2+}$  promotes cocaine sensitization, reward, and cocaine-seeking behavior.

480

#### 481 **Low dietary $Zn^{2+}$ decreases brain $Zn^{2+}$ and attenuates cocaine locomotor sensitization,** 482 **reward and cocaine-induced DAT upregulation**

483  $Zn^{2+}$  is an essential element and chronic drug abuse (including cocaine) in humans is  
484 associated with malnutrition and dysregulated peripheral  $Zn^{2+}$  levels (8-13). Here we show that  
485 human cocaine abusers also show deficits in striatal  $Zn^{2+}$ , however, whether dietary  $Zn^{2+}$   
486 modulates cocaine-induced behavioral effects is unknown. To examine this, we fed mice custom  
487 diets formulated with either 30 (adequate) or 5 (low) ppm  $Zn^{2+}$  (Figure 5A) for approximately one  
488 month. Diet-fed mice did not differ in body weight (Figure 5B) and the 5 ppm diet produced a  
489 decrease in food intake which lasted for only a few days after its introduction (Figure 5C). TXRF  
490 showed that mice fed the 5 ppm diet had significantly lower  $Zn^{2+}$  in cortex compared to mice fed  
491 the 30 ppm diet (Figure 5D).

492 Next, we performed cocaine locomotor sensitization in 30 ppm and 5 ppm mice using the  
493 same procedures as in the ZnT3 KO experiments. Both 5 ppm and 30 ppm mice developed cocaine  
494 locomotor sensitization (Figure 5E) and did not differ in cocaine-induced locomotion at this stage.  
495 However, whereas cocaine-treated 30 ppm mice showed significantly greater expression of  
496 cocaine locomotor sensitization compared to vehicle-treated 30 ppm mice (Figure 5F), cocaine-  
497 treated 5 ppm mice did not differ from vehicle-treated 5 ppm mice (Figure 5G).

498 30 ppm and 5 ppm mice were also assessed for cocaine preference using the same CPP  
499 procedure as in ZnT3 KO mice. 30 ppm mice showed cocaine preference at 5, 10, and 20 mg/kg,  
500 but 5 ppm mice showed cocaine preference only at 10 and 20 mg/kg (Figure 5H).

501 Finally, 30 ppm and 5 ppm mice exposed to escalating cocaine injections (5, 10, and 20  
502 mg/kg, IP, one injection/hour) were euthanized 24 hours after the last injection and their brains  
503 were assessed for striatal [<sup>3</sup>H]WIN-35,428 binding. 5 ppm mice exhibited significantly lower DAT  
504 binding (Figure 5J) and lower cocaine affinity (Figure 5I) compared to 30 ppm mice. In sum, these  
505 findings suggest that low dietary Zn<sup>2+</sup> intake decreases brain Zn<sup>2+</sup> levels, and attenuates cocaine  
506 locomotor sensitization, cocaine preference, and cocaine-induced increases in striatal DAT.

507

## 508 **Discussion**

509

510 These results are the first to describe the involvement of synaptic Zn<sup>2+</sup> in regulating DA  
511 neurotransmission as well as physiological and behavioral effects to cocaine and have important  
512 implications for both general DA-dependent behaviors and especially for the prevention and  
513 treatment of cocaine addiction. Specifically, our findings suggest that dietary Zn<sup>2+</sup> intake, and  
514 potentially, impaired Zn<sup>2+</sup> absorption or excretion mechanisms, are implicated in cocaine reward,  
515 seeking, and relapse. As Zn<sup>2+</sup> is an essential element that must be obtained from food such as  
516 oysters, meats, nuts, grains, and dairy, we propose that the Zn<sup>2+</sup> deficits we identify here in human  
517 cocaine abusers arise from a combination of poor nutrition and cocaine-induced synaptic Zn<sup>2+</sup>  
518 turnover/metabolism. Consequently, we suggest that the Zn<sup>2+</sup> status of patients with cocaine  
519 addiction should be taken into consideration, especially since Zn<sup>2+</sup> deficiency varies in prevalence  
520 across social demographics and is found in higher proportion in developing countries (38).

521 Our findings also expand the current understanding of cocaine neurobiology. DA and  
522 glutamate systems converge at the level of the striatum to modulate behaviors that influence  
523 cocaine seeking and abuse (24, 39). Zn<sup>2+</sup>, mediated by ZnT3, is packaged with glutamate in the  
524 same synaptic vesicles and released by glutamatergic terminals in the striatum. As such, the  
525 cocaine-induced striatal Zn<sup>2+</sup> changes we report likely accompany the well-described cocaine-  
526 induced increases in striatal glutamate neurotransmission (23, 24). Interestingly, Zn<sup>2+</sup> binds to  
527 NMDA and AMPA receptors (40, 41) and it is likely that, in addition to DA signaling, cocaine-  
528 induced changes in synaptic Zn<sup>2+</sup> may exert allosteric interactions at ionotropic glutamate  
529 receptors to influence cocaine-dependent glutamate neurotransmission and behaviors such as  
530 cocaine locomotor sensitization and cocaine priming-induced reinstatement of cocaine seeking  
531 (23, 24, 42). Finally, we propose that the cocaine-dependent changes in Zn<sup>2+</sup> that we describe here

532 are not specific to cocaine but can be elicited by other psychostimulants that modulate DAT  
533 function and increase corticostriatal glutamate neurotransmission (23, 24, 43), and potentially  
534 other drugs of abuse, including alcohol (44)

535 Finally, in addition to its critical role in addiction, the DAT is the primary molecular target  
536 for stimulant medications used in the treatment of attention-deficit hyperactivity disorder (ADHD).  
537 Studies indicate that medication response is reduced in  $Zn^{2+}$ -deficient ADHD patients (45). Our  
538 findings here offer a mechanistic explanation for these clinical observations and suggest that  $Zn^{2+}$   
539 supplementation may improve the efficacy of stimulant-based ADHD medications.

540 In conclusion, our findings expand current knowledge regarding the direct  
541 pharmacological mechanism of action of cocaine and the brain mechanisms involved in cocaine's  
542 behavioral effects by identifying a critical role for the trace element  $Zn^{2+}$  as an environmentally  
543 derived modulator of cocaine affinity, potency, plasticity, reward, and seeking.

544 **Acknowledgments and Author contributions**

545 JLG, JB, SL, DM, KW, MLC, LAR, RJE, CJ, GB, JK, MP, MB, ZX, GT, and MM designed and/or  
546 performed experiments and/or analyzed data. ZX, GT, and MM supervised work. JLG, JB, and  
547 MM wrote the paper with input from all coauthors. The authors thank Dr. Thanos Tzounopoulos  
548 (University of Pittsburgh) for sharing ZnT3 knockout mice, Dr Richard Dyck (University of  
549 Calgary) for advice regarding Zn<sup>2+</sup> staining, Dr. Yavin Shaham (NIDA) for experimental advice  
550 in behavioral experimentation and for manuscript comments, and Dr. Marisela Morales (NIDA),  
551 Dr. Antonio Lanzirotti, Dr. Keith Jones and William Rao at the National Synchrotron Light Source  
552 (NSLS) X26a Beamline at Brookhaven National Laboratory for instrumentation access. This work  
553 was supported by the NIDA Intramural Research Program (DA000069), the NIDA Medication  
554 Development Program (DA000611) and the Department of Energy (DOE) GeoSciences grant DE-  
555 FG02-92ER14244.

556

557

558 **Conflict of Interest:** The authors have declared that no conflict of interest exists.

559  
560  
561  
562  
563  
564  
565  
566  
567  
568  
569  
570  
571  
572  
573  
574  
575  
576  
577  
578  
579  
580  
581  
582  
583  
584  
585  
586  
587  
588  
589  
590  
591  
592  
593  
594  
595  
596  
597  
598  
599  
600  
601  
602  
603  
604

## References

1. Frederickson CJ, Suh SW, Silva D, and Thompson RB. Importance of zinc in the central nervous system: the zinc-containing neuron. *J Nutr.* 2000;130(5S Suppl):1471s-83s.
2. Gower-Winter SD, and Levenson CW. Zinc in the central nervous system: From molecules to behavior. *Biofactors.* 2012;38(3):186-93.
3. Pfeiffer CC, and Braverman ER. Zinc, the brain and behavior. *Biol Psychiatry.* 1982;17(4):513-32.
4. Sensi SL, Paoletti P, Koh JY, Aizenman E, Bush AI, and Hershfinkel M. The neurophysiology and pathology of brain zinc. *J Neurosci.* 2011;31(45):16076-85.
5. Cuajungco MP, and Lees GJ. Zinc metabolism in the brain: relevance to human neurodegenerative disorders. *Neurobiol Dis.* 1997;4(3-4):137-69.
6. Palmiter RD, Cole TB, Quaife CJ, and Findley SD. ZnT-3, a putative transporter of zinc into synaptic vesicles. *Proc Natl Acad Sci U S A.* 1996;93(25):14934-9.
7. Cole TB, Wenzel HJ, Kafer KE, Schwartzkroin PA, and Palmiter RD. Elimination of zinc from synaptic vesicles in the intact mouse brain by disruption of the ZnT3 gene. *Proc Natl Acad Sci U S A.* 1999;96(4):1716-21.
8. Santolaria-Fernandez FJ, Gomez-Sirvent JL, Gonzalez-Reimers CE, Batista-Lopez JN, Jorge-Hernandez JA, Rodriguez-Moreno F, et al. Nutritional assessment of drug addicts. *Drug Alcohol Depend.* 1995;38(1):11-8.
9. Comai S, Bertazzo A, Vachon J, Daigle M, Toupin J, Cote G, et al. Trace elements among a sample of prisoners with mental and personality disorders and aggression: correlation with impulsivity and ADHD indices. *J Trace Elem Med Biol.* 2019;51:123-9.
10. Sadlik J, Pach J, Winnik L, and Piekoszewski W. [Concentration of zinc, copper and magnesium in the serum of drug addicts]. *Przegl Lek.* 2000;57(10):563-4.
11. Cheng FL, Wang H, Wu J, Ning MX, Hu LF, and Su YL. [Determination and correlation analysis of trace elements in hair of dependence drug addicts]. *Guang Pu Xue Yu Guang Pu Fen Xi.* 2005;25(1):116-8.
12. Ruiz Martinez M, Gil Extremera B, Maldonado Martin A, Cantero-Hinojosa J, and Moreno-Abadia V. Trace elements in drug addicts. *Klin Wochenschr.* 1990;68(10):507-11.
13. Hossain KJ, Kamal MM, Ahsan M, and Islam SN. *Subst Abuse Treat Prev Policy.* 2007:12.
14. Kuhar MJ, Ritz MC, and Boja JW. The dopamine hypothesis of the reinforcing properties of cocaine. *Trends Neurosci.* 1991;14(7):299-302.
15. Volkow ND, Wang GJ, Fischman MW, Foltin RW, Fowler JS, Abumrad NN, et al. Relationship between subjective effects of cocaine and dopamine transporter occupancy. *Nature.* 1997;386(6627):827-30.
16. Wise RA, and Bozarth MA. A psychomotor stimulant theory of addiction. *Psychol Rev.* 1987;94(4):469-92.
17. Wu Q, Coffey LL, and Reith ME. Cations affect [3H]mazindol and [3H]WIN 35,428 binding to the human dopamine transporter in a similar fashion. *J Neurochem.* 1997;69(3):1106-18.
18. Scholze P, Norregaard L, Singer EA, Freissmuth M, Gether U, and Sitte HH. The role of zinc ions in reverse transport mediated by monoamine transporters. *J Biol Chem.* 2002;277(24):21505-13.

- 605 19. Liang YJ, Zhen J, Chen N, and Reith ME. Interaction of catechol and non-catechol  
606 substrates with externally or internally facing dopamine transporters. *J Neurochem.*  
607 2009;109(4):981-94.
- 608 20. Hong WC, and Amara SG. Membrane cholesterol modulates the outward facing  
609 conformation of the dopamine transporter and alters cocaine binding. *J Biol Chem.*  
610 2010;285(42):32616-26.
- 611 21. Norregaard L, Frederiksen D, Nielsen EO, and Gether U. Delineation of an endogenous  
612 zinc-binding site in the human dopamine transporter. *Embo j.* 1998;17(15):4266-73.
- 613 22. Ciliax BJ, Drash GW, Staley JK, Haber S, Mobley CJ, Miller GW, et al.  
614 Immunocytochemical localization of the dopamine transporter in human brain. *J Comp*  
615 *Neurol.* 1999;409(1):38-56.
- 616 23. Scofield MD, Heinsbroek JA, Gipson CD, Kupchik YM, Spencer S, Smith AC, et al. The  
617 Nucleus Accumbens: Mechanisms of Addiction across Drug Classes Reflect the  
618 Importance of Glutamate Homeostasis. *Pharmacol Rev.* 2016;68(3):816-71.
- 619 24. Schmidt HD, and Pierce RC. Cocaine-induced neuroadaptations in glutamate  
620 transmission: Potential therapeutic targets for craving and addiction. *Ann N Y Acad Sci.*  
621 2010;1187:35-75.
- 622 25. Proebstl L, Kamp F, Manz K, Krause D, Adorjan K, Pogarell O, et al. Effects of  
623 stimulant drug use on the dopaminergic system: A systematic review and meta-analysis  
624 of in vivo neuroimaging studies. *Eur Psychiatry.* 2019;59:15-24.
- 625 26. Little KY, Zhang L, Desmond T, Frey KA, Dalack GW, and Cassin BJ. Striatal  
626 dopaminergic abnormalities in human cocaine users. *Am J Psychiatry.* 1999;156(2):238-  
627 45.
- 628 27. Jufer RA, Wstadik A, Walsh SL, Levine BS, and Cone EJ. Elimination of cocaine and  
629 metabolites in plasma, saliva, and urine following repeated oral administration to human  
630 volunteers. *J Anal Toxicol.* 2000;24(7):467-77.
- 631 28. Qin Z, Caruso JA, Lai B, Matusch A, and Becker JS. Trace metal imaging with high  
632 spatial resolution: applications in biomedicine. *Metallomics.* 2011;3(1):28-37.
- 633 29. Linkous DH, Flinn JM, Koh JY, Lanzirotti A, Bertsch PM, Jones BF, et al. *J Histochem*  
634 *Cytochem.* 2008:3-6.
- 635 30. Thackray SE, McAllister BB, and Dyck RH. Behavioral characterization of female zinc  
636 transporter 3 (ZnT3) knockout mice. *Behav Brain Res.* 2017;321:36-49.
- 637 31. Cole TB, Martyanova A, and Palmiter RD. Removing zinc from synaptic vesicles does  
638 not impair spatial learning, memory, or sensorimotor functions in the mouse. *Brain Res.*  
639 2001;891(1-2):253-65.
- 640 32. Danscher G, and Stoltenberg M. Zinc-specific autometallographic in vivo selenium  
641 methods: tracing of zinc-enriched (ZEN) terminals, ZEN pathways, and pools of zinc  
642 ions in a multitude of other ZEN cells. *J Histochem Cytochem.* 2005;53(2):141-53.
- 643 33. Sorensen JC, Slomianka L, Christensen J, and Zimmer J. Zinc-containing telencephalic  
644 connections to the rat striatum: a combined Fluoro-Gold tracing and histochemical study.  
645 *Exp Brain Res.* 1995;105(3):370-82.
- 646 34. Takeda A, Sawashita J, and Okada S. Biological half-lives of zinc and manganese in rat  
647 brain. *Brain Res.* 1995;695(1):53-8.
- 648 35. Bjorklund NL, Volz TJ, and Schenk JO. Differential effects of Zn<sup>2+</sup> on the kinetics and  
649 cocaine inhibition of dopamine transport by the human and rat dopamine transporters.  
650 *Eur J Pharmacol.* 2007;565(1-3):17-25.

- 651 36. Pifl C, Wolf A, Rebernik P, Reither H, and Berger ML. Zinc regulates the dopamine  
652 transporter in a membrane potential and chloride dependent manner.  
653 *Neuropharmacology*. 2009;56(2):531-40.
- 654 37. Malison RT, Best SE, van Dyck CH, McCance EF, Wallace EA, Laruelle M, et al.  
655 Elevated striatal dopamine transporters during acute cocaine abstinence as measured by  
656 [123I] beta-CIT SPECT. *Am J Psychiatry*. 1998;155(6):832-4.
- 657 38. Prasad AS. Discovery of human zinc deficiency: its impact on human health and disease.  
658 *Adv Nutr*. 2013;4(2):176-90.
- 659 39. Baker DA, McFarland K, Lake RW, Shen H, Tang XC, Toda S, et al. Neuroadaptations  
660 in cystine-glutamate exchange underlie cocaine relapse. *Nat Neurosci*. 2003;6(7):743-9.
- 661 40. Kalappa BI, Anderson CT, Goldberg JM, Lippard SJ, and Tzounopoulos T. AMPA  
662 receptor inhibition by synaptically released zinc. *Proc Natl Acad Sci U S A*.  
663 2015;112(51):15749-54.
- 664 41. Anderson CT, Radford RJ, Zastrow ML, Zhang DY, Apfel UP, Lippard SJ, et al.  
665 Modulation of extrasynaptic NMDA receptors by synaptic and tonic zinc. *Proc Natl Acad  
666 Sci U S A*. 2015;112(20):E2705-14.
- 667 42. Fouyssac M, and Belin D. Beyond drug-induced alteration of glutamate homeostasis,  
668 astrocytes may contribute to dopamine-dependent intrastriatal functional shifts that  
669 underlie the development of drug addiction: A working hypothesis. *Eur J Neurosci*.  
670 2019;50(6):3014-27.
- 671 43. Bonaventura J, Quiroz C, Cai NS, Rubinstein M, Tanda G, and Ferre S. Key role of the  
672 dopamine D4 receptor in the modulation of corticostriatal glutamatergic  
673 neurotransmission. *Sci Adv*. 2017;3(1):e1601631.
- 674 44. Skalny AV, Skalnaya MG, Grabeklis AR, Skalnaya AA, and Tinkov AA. Zinc deficiency  
675 as a mediator of toxic effects of alcohol abuse. *Eur J Nutr*. 2018;57(7):2313-22.
- 676 45. Lepping P, and Huber M. Role of zinc in the pathogenesis of attention-deficit  
677 hyperactivity disorder: implications for research and treatment. *CNS Drugs*.  
678 2010;24(9):721-8.
- 679 46. Bannon MJ, Johnson MM, Michelhaugh SK, Hartley ZJ, Halter SD, David JA, et al. A  
680 molecular profile of cocaine abuse includes the differential expression of genes that  
681 regulate transcription, chromatin, and dopamine cell phenotype.  
682 *Neuropsychopharmacology*. 2014;39(9):2191-9.
- 683 47. Zhou Y, Michelhaugh SK, Schmidt CJ, Liu JS, Bannon MJ, and Lin Z. Ventral midbrain  
684 correlation between genetic variation and expression of the dopamine transporter gene in  
685 cocaine-abusing versus non-abusing subjects. *Addict Biol*. 2014;19(1):122-31.
- 686 48. Stan AD, Ghose S, Gao XM, Roberts RC, Lewis-Amezcuca K, Hatanpaa KJ, et al. Human  
687 postmortem tissue: what quality markers matter? *Brain Res*. 2006;1123(1):1-11.
- 688 49. Michaelides M, Pascau J, Gispert JD, Delis F, Grandy DK, Wang GJ, et al. Dopamine D4  
689 receptors modulate brain metabolic activity in the prefrontal cortex and cerebellum at rest  
690 and in response to methylphenidate. *Eur J Neurosci*. 2010;32(4):668-76.
- 691 50. Keighron JD, Quarterman JC, Cao J, DeMarco EM, Coggiano MA, Gleaves A, et al.  
692 Effects of (R)-Modafinil and Modafinil Analogues on Dopamine Dynamics Assessed by  
693 Voltammetry and Microdialysis in the Mouse Nucleus Accumbens Shell. *ACS Chem  
694 Neurosci*. 2019;10(4):2012-21.
- 695

## Zinc potentiates dopamine neurotransmission and cocaine seeking

Gomez et al.

Figure 1

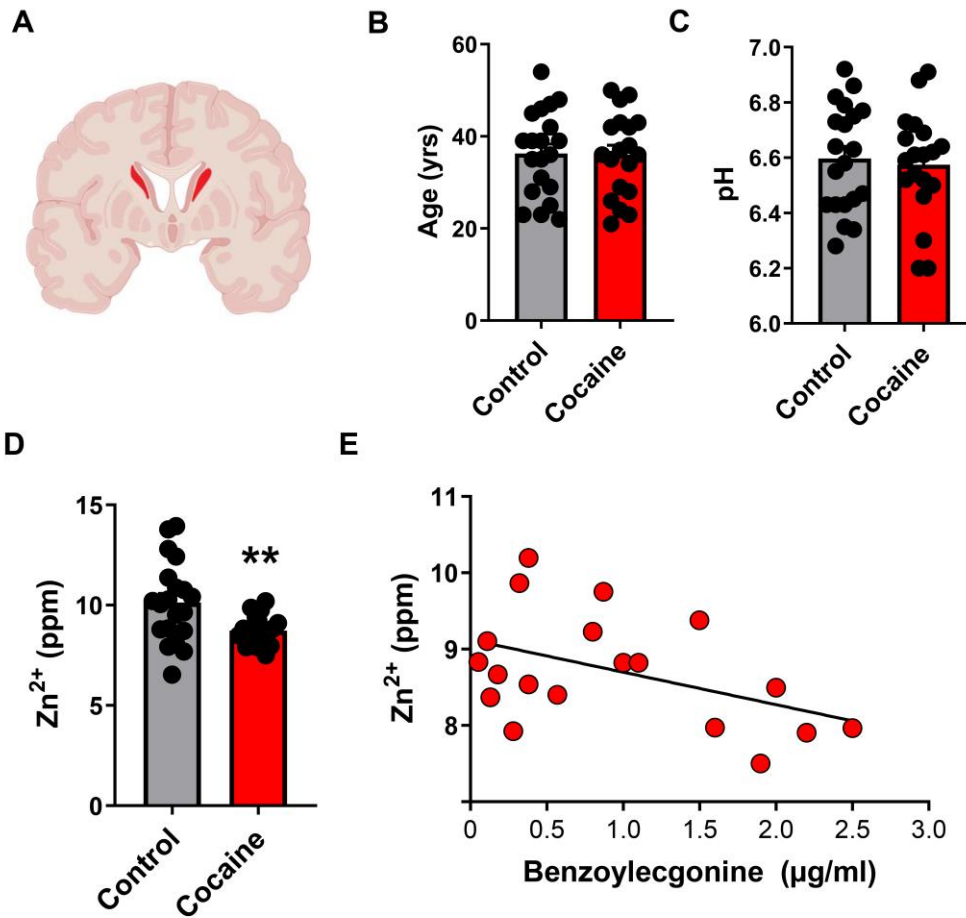

Striatal Zn<sup>2+</sup> is low in human cocaine abusers and correlates with cocaine intake.

(A) Schematic showing sampled region (caudate) from postmortem human brain. (B) Cocaine users (n=19) and control (n=20) subjects did not differ in age or (C) in tissue pH. (D) Cocaine users (n=19) showed significantly lower striatal Zn<sup>2+</sup> (unpaired t-test,  $t=2.87$ ;  $p=0.006$ ) compared to control subjects (n=20). (E) Striatal Zn<sup>2+</sup> in cocaine users (n=19) correlated significantly (linear regression;  $F(1, 17)=4.5$ ;  $p=0.04$ ) with plasma benzoyllecgonine levels. \*\* $p\leq 0.05$ . All data expressed as Mean  $\pm$  SEM.



## Zinc potentiates dopamine neurotransmission and cocaine seeking

Gomez et al.

### Figure 2

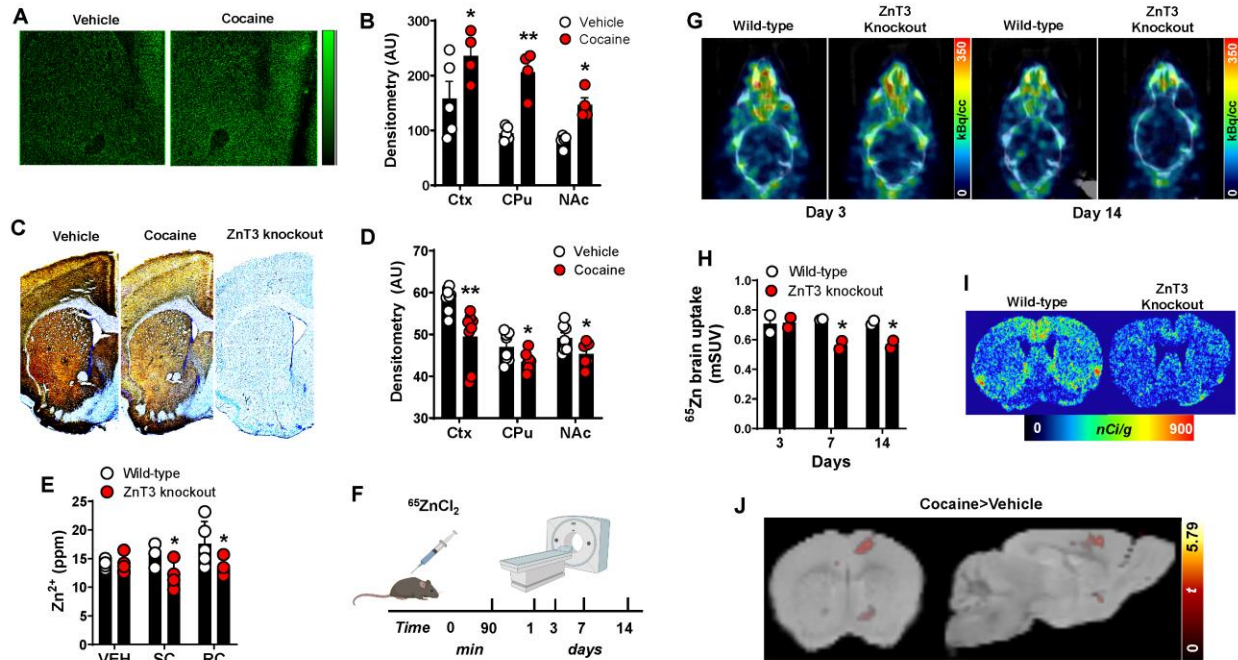

### Cocaine increases synaptic Zn<sup>2+</sup> levels and turnover in the striatum via ZnT3-mediated

**exocytosis.** (A) Representative synchrotron X-ray fluorescence microspectroscopy ( $\mu$ SXRF) Zn<sup>2+</sup>

maps from vehicle- or cocaine-treated mice. (B) Cocaine-treated mice (n=4) had significantly greater (2-way anova, genotype main effect,  $F(1,21)=30.11$ ;  $p<0.001$ ) Zn<sup>2+</sup> (AU-arbitrary units)

than vehicle-treated mice (n=5) in cortex (Ctx) ( $t=2.91$ ;  $p=0.02$ ), caudate putamen (CPu) ( $t=4.16$ ;  $p=0.001$ ), and nucleus accumbens (NAc) ( $t=2.44$ ;  $p=0.02$ ). (C) Representative Timm- and cresyl

violet- co-stained sections from vehicle- and cocaine-treated mice and a ZnT3 knockout mouse.

(D) Cocaine-treated mice (n=2 mice, 8 samples/mouse/region) had significantly lower (2-way anova, genotype main effect,  $F(1, 41)=24.14$ ;  $p<0.001$ ) vesicular Zn<sup>2+</sup> than vehicle-treated mice

(n=2 mice/8 samples/mouse/region) in Ctx ( $t=3.58$ ;  $p=0.003$ ), CPu ( $t=2.46$ ;  $p=0.02$ ), and NAc ( $t=2.39$ ;  $p=0.03$ ). (E) Zn<sup>2+</sup> content in wild-type and ZnT3 knockout mice exposed to vehicle (n=6

wild-type, n=9 knockout), a single cocaine injection (SC) (n=4 wild-type, n=4 knockout) or repeated cocaine injections (RC) (n=5 wild-type, n=4 knockout) injections. Wild-type mice

exposed to cocaine had significantly greater (2-way anova, genotype main effect,  $F(1, 26)=13.65$ ;  $p=0.001$ ) Zn<sup>2+</sup> levels compared to knockout mice exposed to SC ( $t=2.46$ ;  $p=0.04$ ) or RC injections

( $t=3.07$ ;  $p=0.01$ ). (F) PET experimental timeline. (G) Representative horizontal <sup>65</sup>Zn PET/CT

## Zinc potentiates dopamine neurotransmission and cocaine seeking

Gomez et al.

21 images from wild-type and ZnT3 knockout mice scanned at 3 and 14 days after  $^{65}\text{ZnCl}_2$   
22 administration. **(H)**  $^{65}\text{Zn}$  brain uptake expressed as mean standard uptake value (mSUV) in wild-  
23 type (n=2) and knockout (n=2) mice scanned at 3, 7 and 14 days after injection. ZnT3 knockout  
24 mice showed significantly lower (2 way anova, genotype main effect,  $F(1, 2)=34.82$ ,  $p=0.02$ )  $^{65}\text{Zn}$   
25 uptake at 7 ( $t=3.78$ ;  $p=0.02$ ) and 14 ( $t=3.21$ ;  $p=0.03$ ) days post injection. **(I)** Representative  $^{65}\text{Zn}$   
26 autoradiograms from wild-type and ZnT3 knockout mice at day 15 after  $^{65}\text{ZnCl}_2$  administration.  
27 **(J)** Statistical parametric maps from vehicle- (n=4) or cocaine-treated (n=3) mice exposed to  $^{65}\text{Zn}$   
28 PET imaging. Cocaine-treated mice showed significantly lower  $^{65}\text{Zn}$  uptake in Ctx and NAc (1-  
29 way anova, treatment main effect, t contrast (1, 4)=2.13;  $p=0.049$ ). \* $p\leq 0.05$ , \*\* $p\leq 0.01$ . All data  
30 expressed as Mean  $\pm$ SEM.

## Zinc potentiates dopamine neurotransmission and cocaine seeking

Gomez et al.

**Figure 3**

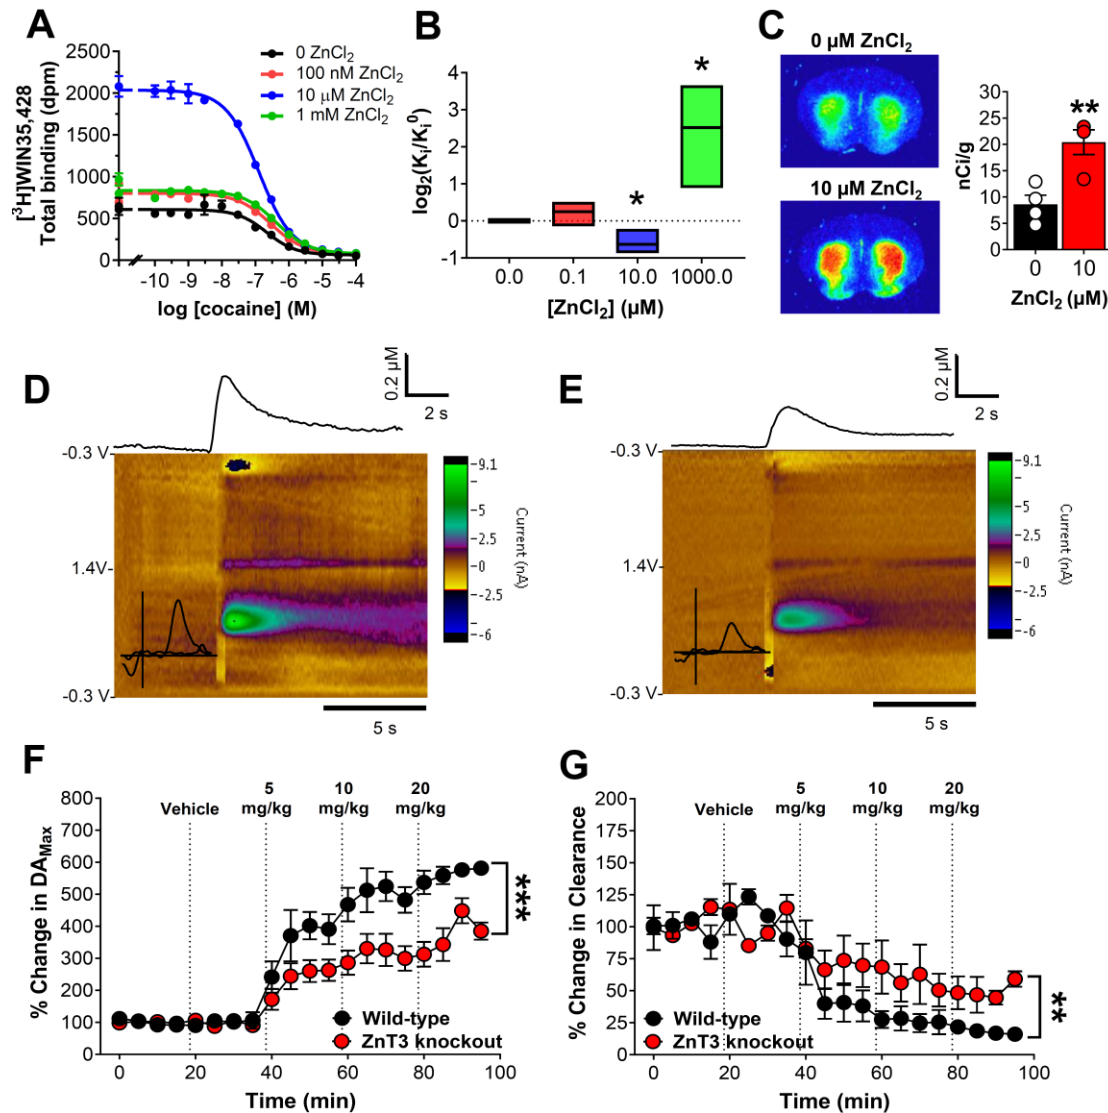

**Synaptic Zn<sup>2+</sup> binds to the DAT and increases the *in vivo* potency of cocaine on DA**

**neurotransmission.** (A) Competition binding of cocaine and ZnCl<sub>2</sub> against [<sup>3</sup>H]WIN-35,428 in

mouse striatal tissue (n=6 mice, combined). 10 μM ZnCl<sub>2</sub> increased and 1 mM ZnCl<sub>2</sub> decreased

[<sup>3</sup>H]WIN-35,428 binding (3 repetitions/curve in triplicate). (B) 10 μM ZnCl<sub>2</sub> significantly

increased (unpaired t-test, t=3.01; p=0.03) and 1 mM ZnCl<sub>2</sub> significantly decreased (unpaired t-

test, t=3.01; p=0.03) affinity of cocaine in mouse striatum (K<sub>i</sub> (±SD) values in nM; Cocaine: 0 μM

Zn, 63±39; 0.1 μM Zn, 77±57; 10 μM Zn, 43±31; 1000 μM Zn, 611±843 and WIN35,428: 0 μM

Zn, 9±1.2; 0.1 μM Zn, 9.2±0.8; 10 μM Zn, 5.1±1.1; 1000 μM Zn, 13.4±1.8). (C) Autoradiograms

## Zinc potentiates dopamine neurotransmission and cocaine seeking

Gomez et al.

13 at the level of mouse striatum (n=4 mice) showing that 10  $\mu$ M ZnCl<sub>2</sub> significantly increased  
14 [<sup>3</sup>H]WIN-35,428 binding (unpaired t-test, t=4.03; p=0.007). **(D)** Representative fast scan cyclic  
15 voltammetry (FSCV) color plots from wild-type (n=4) and **(E)** ZnT3 knockout (n=4) mice  
16 showing dopamine (DA) responses after a 10 mg/kg IP cocaine injection. **(F)** FSCV time-course  
17 plots showing significantly lower percent change in DA<sub>Max</sub> (2-way repeated measures (RM) anova;  
18 genotype x time interaction, F(19, 114)=5.46; p<0.001) and **(G)** faster DA Clearance rate (2-way  
19 RM anova; genotype x time interaction, F(19, 114)=2.35 p=0.0029) in ZnT3 knockout (n=4)  
20 compared to wild-type mice (n=4) as a function of vehicle or escalating IP cocaine injections.  
21 \*p≤0.05, \*\*p≤0.01, \*\*\*p≤0.001. All data expressed as Mean ±SEM.

## Zinc potentiates dopamine neurotransmission and cocaine seeking

Gomez et al.

**Figure 4**

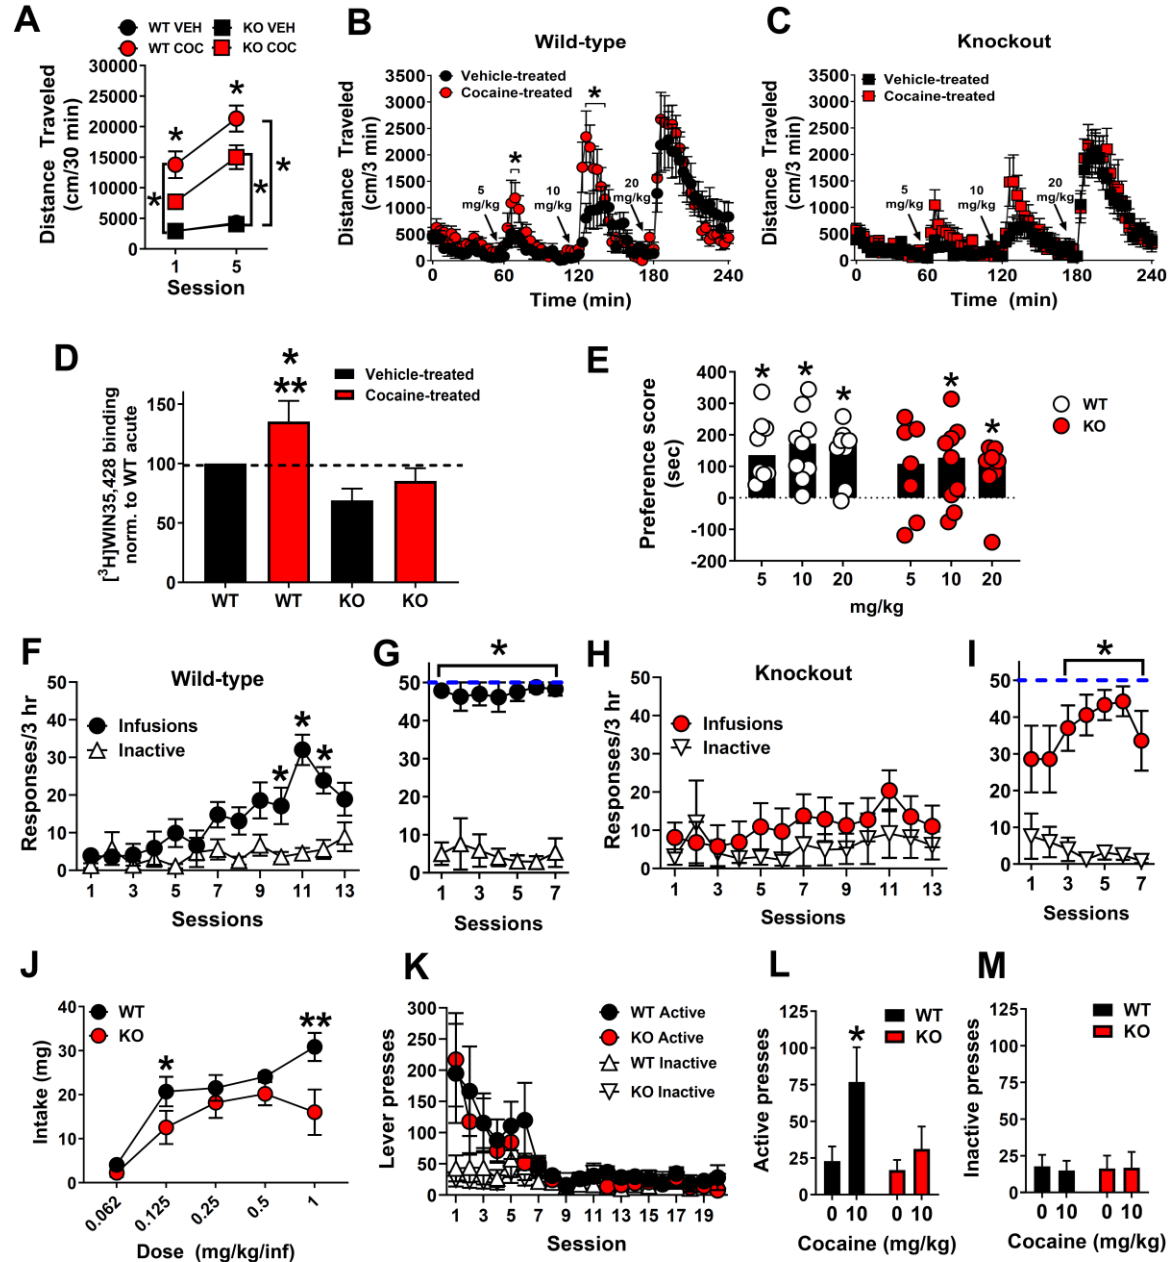

**Synaptic Zn<sup>2+</sup> potentiates cocaine locomotor sensitization and reward and is required for cocaine-induced DAT upregulation and cocaine reinstatement.** (A) ZnT3 knockout (KO) mice injected daily with 10 mg/kg cocaine (COC) (n=16) showed significantly lower (2-way repeated measures (RM) anova, genotype x session interaction, F(3, 59)=7.07; p=0.004) locomotor activity on Day 1 (t=3.09; p=0.01) and Day 5 (t=3.22; p=0.009) of cocaine locomotor sensitization

## Zinc potentiates dopamine neurotransmission and cocaine seeking

Gomez et al.

10 compared to cocaine-injected wild-type (WT) mice (n=15). Wild-type mice injected with cocaine  
11 showed significantly greater locomotor activity than vehicle (VEH)-treated WT (n=16) mice on  
12 Day 1 (t=5.54; p<0.001) and Day 5 (t=8.71; p<0.001). KO mice injected with cocaine showed  
13 significantly greater locomotor activity than vehicle-treated KO (n=16) mice on Day 5 (t=5.68;  
14 p<0.001) but not on Day 1 (t=2.48; p=0.08). **(B)** Cocaine-treated wild-type mice (n=9) showed  
15 significantly greater (2-way RM anova, genotype x time interaction, F(79, 1343)=1.85; p<0.001)  
16 expression of cocaine locomotor sensitization at 5 (66 min; t=3.65; p=0.02, 69 min; t=3.72; p=0.01)  
17 and 10 mg/kg cocaine (123 min; t=5.24; p<0.001, 126 min; t=6.03; p<0.001, 129 min; t=5.19;  
18 p<0.001, 132 min; t=3.75; p=0.01, 135 min; t=3.54; p=0.03) compared to vehicle-treated wild-type  
19 mice (n=10). **(C)** Cocaine-treated ZnT3 knockout mice (n=10) did not show any significant  
20 difference in locomotor sensitization compared to vehicle-treated knockout mice (2-way RM anova,  
21 genotype x time interaction, F(79, 1422)=0.9197; p=0.67) (n=10). **(D)** WT mice had significantly  
22 greater DAT binding (2-way anova, genotype main effect, F(1, 8)=12.87; p=0.007) (3 repetitions  
23 per curve, in triplicate) compared to ZnT3 KO mice. Cocaine-treated WT mice (n=6) had  
24 significantly greater (t=3.12; p=0.01) DAT binding than cocaine-treated ZnT3 KO mice (n=6) and  
25 vehicle-treated KO mice (n=6) (t=4.14; p=0.003) and a trend toward significantly greater DAT  
26 binding in vehicle-treated WT mice (n=6/treatment; t=2.19; p=0.059). **(E)** WT mice showed  
27 significant preference for a chamber paired with cocaine (1 sample t-tests) at 5 (n=8, t=4.3;  
28 p=0.003), 10 (n=9, t=4.45; p=0.002), and 20 (n=8, t=4.48; p=0.003) mg/kg. ZnT3 KO mice showed  
29 significant preference for a chamber paired with cocaine at 10 (n=9, t=2.35; p=0.04) and 20 (n=7,  
30 t=2.51; p=0.04) but not at 5 mg/kg (n=7; t=1.6; p=0.16). **(F)** Wild-type mice exposed to cocaine (1  
31 mg/kg/inf.) (n=9) showed significantly greater (mixed effects RM analysis; lever x session  
32 interaction, F(12, 206)=3.19; p=0.003) cocaine-reinforced presses compared to inactive lever  
33 presses (session 10: t=3.07; p=0.02, session 11: t=6.21; p<0.001, session 12: t=4.15; p<0.001). **(G)**  
34 Wild-type mice exposed to cocaine (0.5 mg/kg/inf.) (n=7) showed significantly greater cocaine-  
35 reinforced presses (2-way RM anova, lever main effect, F(1, 12)=116.7; p<0.001) compared to  
36 inactive lever presses (session 1: t=12.54; p<0.001, session 2: t=5.03; p=0.004, session 3: t=7.91;  
37 p<0.001, session 4: t=9.39; p<0.001, session 5: t=15.45; p<0.001, session 6: t=23.33; p<0.001,  
38 session 7: t=10.42; p<0.001). **(H)** ZnT3 knockout mice exposed to cocaine (1 mg/kg/inf.) (n=9) did  
39 not show any significant differences (2-way repeated RM anova, genotype x session interaction,  
40 F(12, 192)=1.27; p=0.23) in cocaine-reinforced or inactive lever pressing. **(I)** ZnT3 knockout mice

## Zinc potentiates dopamine neurotransmission and cocaine seeking

Gomez et al.

41 exposed to cocaine (0.5 mg/kg/inf.) (n=7) showed significantly greater cocaine-reinforced presses  
42 (2-way RM anova, lever x time interaction,  $F(6, 71)=3.9$ ;  $p=0.002$ ) compared to inactive lever  
43 presses (session 3:  $t=4.74$ ;  $p=0.007$ , session 4:  $t=7.03$ ;  $p=0.002$ , session 5:  $t=8.86$ ;  $p<0.001$ , session  
44 6:  $t=9.82$ ;  $p<0.001$ , session 7:  $t=4.01$ ;  $p=0.04$ ). **(J)** ZnT3 KO mice (n=5) showed significantly lower  
45 cocaine intake (mixed effects RM analysis, genotype x dose interaction,  $F(4, 44) =2.92$ ) at 1  
46 mg/kg/inf. ( $t=3.26$ ;  $p=0.001$ ) and at 0.125 mg/kg/inf. ( $t=2.03$ ;  $p=0.04$ ) compared to WT mice (n=6).  
47 **(K)** WT and ZnT3 KO mice (n=5) did not differ in extinction of cocaine self-administration. **(L)**  
48 After extinction of cocaine self-administration behavior, WT mice (n=5) showed reinstatement of  
49 cocaine self-administration and significantly greater active lever presses (2-way RM anova,  
50 genotype x dose interaction,  $F(1, 10)=5.09$ ;  $p=0.04$ ) after cocaine priming ( $t=3.17$ ;  $p=0.005$ )  
51 compared to ZnT3 KO mice (n=5). **(N)** WT (n=5) and ZnT3 KO mice (n=5) did not differ in inactive  
52 lever responding (2-way RM anova, genotype x dose interaction,  $F(1, 10)=0.17$ ;  $p=0.68$ ) during  
53 cocaine-primed reinstatement. \* $p\leq 0.05$ . All data expressed as Mean  $\pm$  SEM.

## Zinc potentiates dopamine neurotransmission and cocaine seeking

Gomez et al.

**Figure 5**

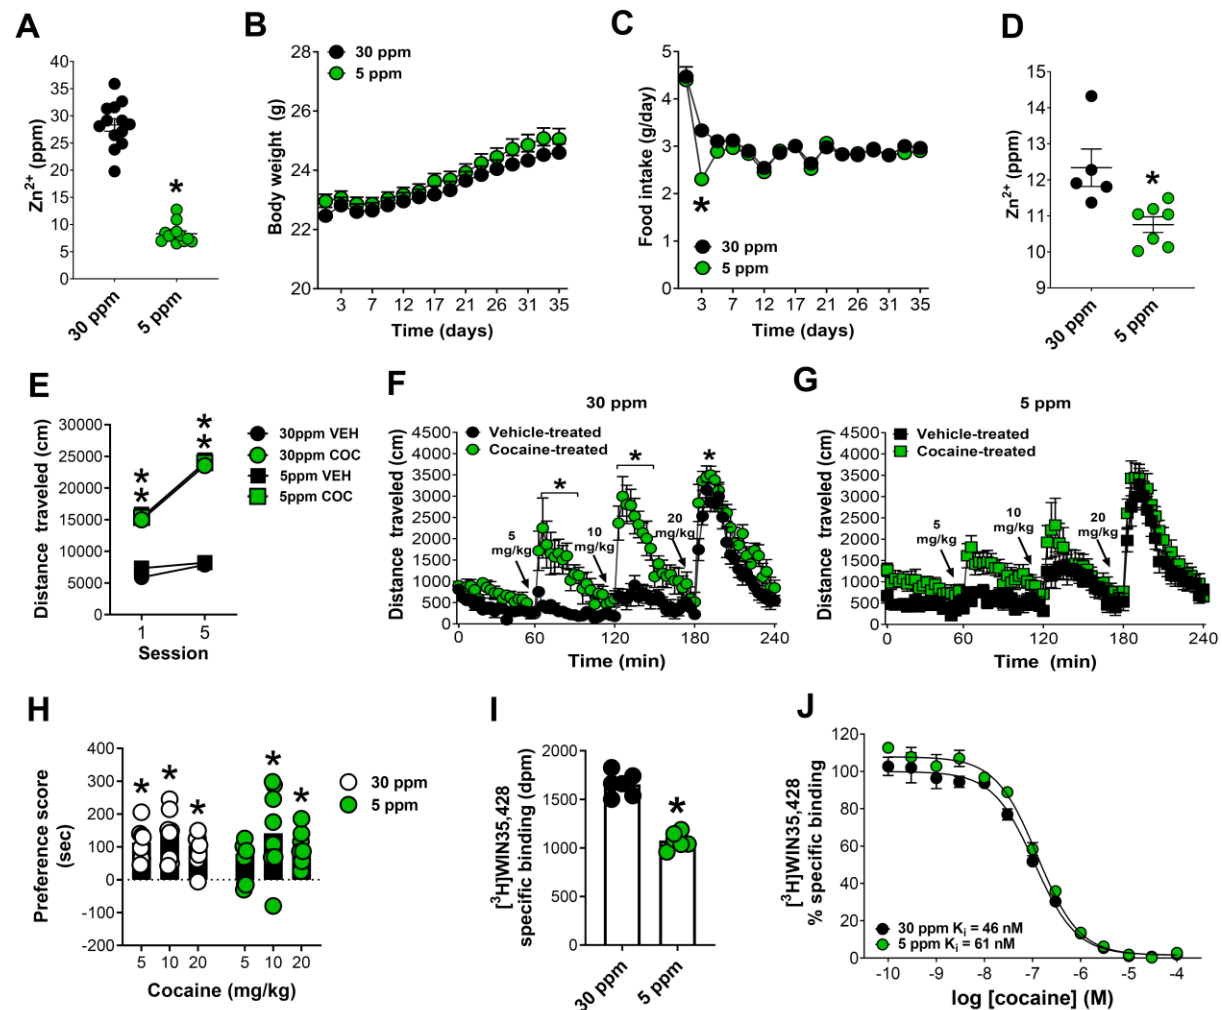

**Low dietary Zn<sup>2+</sup> decreases brain Zn<sup>2+</sup> and attenuates cocaine locomotor sensitization,**

**reward and cocaine-induced DAT upregulation. (A)** Total reflection X-ray spectroscopy

(TXRF)-based verification of Zn<sup>2+</sup> content as a function of diet (unpaired t-test;  $t=15.36$ ;  $p<0.001$ ).

**(B)** Mice fed a 5 ppm Zn<sup>2+</sup> diet ( $n=32$ ) did not differ from mice fed a 30 ppm Zn<sup>2+</sup> diet ( $n=32$ ) in

body weight. **(C)** Mice fed a 5 ppm Zn<sup>2+</sup> diet ( $n=32$ ) showed a significant decrease (2-way repeated

measures (RM) anova; genotype x time interaction,  $F(15, 930)=10.07$ ;  $p<0.001$ ) in food intake 3

days ( $t=11.37$ ;  $p<0.001$ ) after diet initiation compared to mice fed a 30 ppm Zn<sup>2+</sup> diet ( $n=32$ ).

**(D)** Mice fed a 5 ppm Zn<sup>2+</sup> diet ( $n=7$ ) showed significantly lower total Zn<sup>2+</sup> in fronto/cingulate cortex

(unpaired t-test;  $t=3.15$ ;  $p=0.01$ ) compared to mice fed a 30 ppm Zn<sup>2+</sup> diet ( $n=5$ ) as assessed via

TXRF. **(E)** Mice fed 5 ppm or 30 ppm Zn<sup>2+</sup> diets did not differ in development of cocaine (COC)



## Zinc potentiates dopamine neurotransmission and cocaine seeking

Gomez et al.

15 locomotor sensitization (VEH- vehicle). 30 ppm mice injected with cocaine (n=14) showed  
16 significantly greater locomotor activity (2-way RM anova; genotype x session interaction,  $F(3,$   
17  $52)=23.57$ ;  $p<0.001$ ) than 30 ppm mice injected with vehicle (n=14) at Day 1 ( $t=8.29$ ;  $p<0.001$ )  
18 and Day 5 ( $t=14.27$ ;  $p<0.001$ ). 5 ppm mice injected with cocaine (n=14) showed significantly  
19 greater locomotor activity compared to 5 ppm mice injected with vehicle (n=14) at Day 1 ( $t=6.95$ ;  
20  $p<0.001$ ) and Day 5 ( $t=13.95$ ;  $p<0.001$ ). 30 ppm mice injected with cocaine showed significantly  
21 greater locomotor activity at Day 5 than on Day 1 ( $t=9.98$ ;  $p<0.001$ ). 5 ppm mice injected with  
22 cocaine showed significantly greater locomotor activity at Day 5 than on Day 1 ( $t=10.06$ ;  $p<0.001$ ).  
23 **(F)** Cocaine-treated 30 ppm diet mice (n=6) showed significantly greater expression of cocaine  
24 locomotor sensitization (2-way RM anova; genotype x time interaction,  $F(79, 790)=3.98$ ;  $p<0.001$ )  
25 at 5 (66 min;  $t=5.69$ ;  $p<0.001$ , 69 min;  $t=4.68$ ;  $p<0.001$ , 72 min;  $t=3.76$ ;  $p=0.01$ , 75 min;  $t=3.78$ ;  
26  $p=0.01$ , 78 min;  $t=4.29$ ;  $p=0.001$ , 81 min;  $t=3.79$ ;  $p=0.01$ , 84 min;  $t=4.23$ ;  $p=0.002$ ), 10 mg/kg  
27 (123 min;  $t=5.37$ ;  $p<0.001$ , 126 min;  $t=7.42$ ;  $p<0.001$ , 129 min;  $t=6.99$ ;  $p<0.001$ , 132 min;  $t=6.58$ ;  
28  $p=0.01$ , 135 min;  $t=5.08$ ;  $p=0.03$ , 138 min;  $t=5.36$ ;  $p=0.03$ , 141 min;  $t=4.39$ ;  $p=0.03$ , 144 min;  
29  $t=4.14$ ;  $p=0.03$ , 147 min;  $t=3.78$ ;  $p=0.03$ ) and 20 mg/kg cocaine (183 min;  $t=3.43$ ;  $p=0.04$ )  
30 compared to vehicle-treated 30 ppm mice (n=13). **(G)** Cocaine-treated 5 ppm mice (n=6) did not  
31 show any significant difference in locomotor sensitization compared to vehicle-treated 5 ppm mice  
32 (n=6) (2-way RM anova; genotype x time interaction,  $F(79, 790)=0.9342$ ;  $p=0.64$ ). **(H)** Mice fed  
33 a 30 ppm  $Zn^{2+}$  diet showed significant preference (one sampled t-tests) for a chamber paired with  
34 cocaine at 5 ( $t=4.3$ ;  $p=0.003$ ) (n=8), 10 ( $t=4.45$ ;  $p=0.002$ ) (n=8), and 20 ( $t=4.48$ ;  $p=0.003$ ) (n=7)  
35 mg/kg. Mice fed a 5 ppm  $Zn^{2+}$  diet showed significant preference (one sample t-tests) for a  
36 chamber paired with cocaine at 10 ( $t=2.35$ ;  $p=0.04$ ) (n=8), and 20 ( $t=2.51$ ;  $p=0.04$ ) (n=8) mg/kg  
37 but not at 5 mg/kg ( $t=1.6$ ;  $p=0.16$ ) (n=8). **(I)** Mice exposed to cocaine and a 5 ppm  $Zn^{2+}$  diet (n=6)  
38 showed significantly lower DAT binding (unpaired t-test;  $t=9.63$ ;  $p<0.001$ ) (3 repetitions per  
39 group, in triplicate) and **(J)** a decrease in cocaine affinity in striatum compared to mice exposed to  
40 cocaine and a 30 ppm diet (n=6) (3 repetitions per curve, in triplicate). dpm - disintegrations per  
41 minute. \* $p\leq 0.05$ . All data expressed as Mean  $\pm$  SEM.
